# Supplementary material for: A universal cross-linking binding polymer composite for ultrahigh-loading Li-ion battery electrodes
Source: Royal Society of Chemistry journal article supplement (doi:10.1039/d0ta00714e), 2020-01-01
Supplement: d0ta00714e1.pdf [file d0ta00714e1.pdf]

## Supporting Information

### **A universal cross-linking binding polymer composite for ultrahigh-loading Li-ion battery electrodes**

Dong Wang,<sup>ac‡</sup> Qian Zhang,<sup>ac‡</sup> Jie Liu,<sup>\*ab</sup> Erying Zhao,<sup>d</sup> Zhenwei Li,<sup>ac</sup> Yu Yang,<sup>ac</sup> Ziyang Guo,<sup>ac</sup> Lei Wang<sup>\*ac</sup> and Shanqing Zhang<sup>e</sup>

<sup>a</sup>Taishan Scholar Advantage and Characteristic Discipline Team of Eco-chemical Process and Technology, State Key Laboratory Base of Eco-chemical Engineering, Qingdao University of Science and Technology, Qingdao 266042, China

E-mail: jie.liu@qust.edu.cn (J. Liu), inorchemwl@126.com (L. Wang)

<sup>b</sup>College of Chemical Engineering, Qingdao University of Science and Technology, Qingdao 266042, China

<sup>c</sup>College of Chemistry and Molecular Engineering, Qingdao University of Science and Technology, Qingdao 266042, China

<sup>d</sup>School of Polymer Science and Engineering, Qingdao University of Science and Technology, Qingdao 266042, China

<sup>e</sup>Centre for Clean Environment and Energy, Environmental Futures Research Institute, School of Environment and Science, Griffith University, QLD 4222, Australia

<sup>‡</sup>These authors contributed equally.

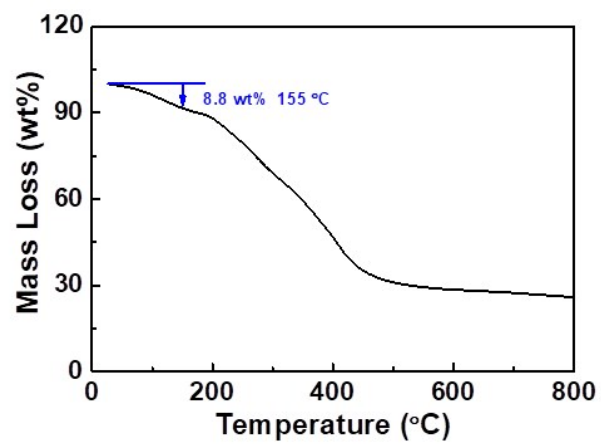

**Fig. S1** TGA curve of m-PAA-XG under N<sub>2</sub> flow with a heating rate of 10 °C min<sup>-1</sup>.

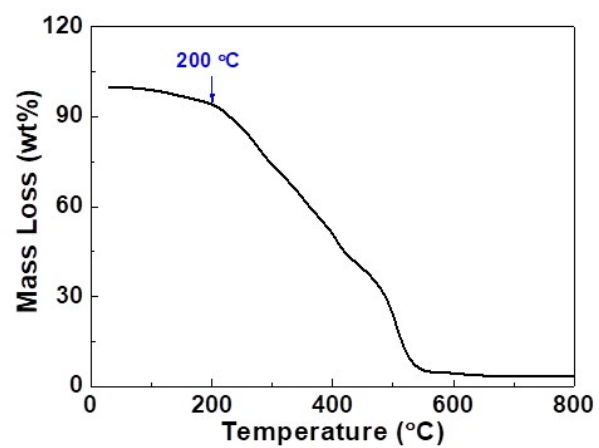

**Fig. S2** TGA curve of c-PAA-XG under air flow with a heating rate of  $10\text{ }^{\circ}\text{C min}^{-1}$ , showing the high thermal stability (up to  $200\text{ }^{\circ}\text{C}$ ) of c-PAA-XG under air condition.

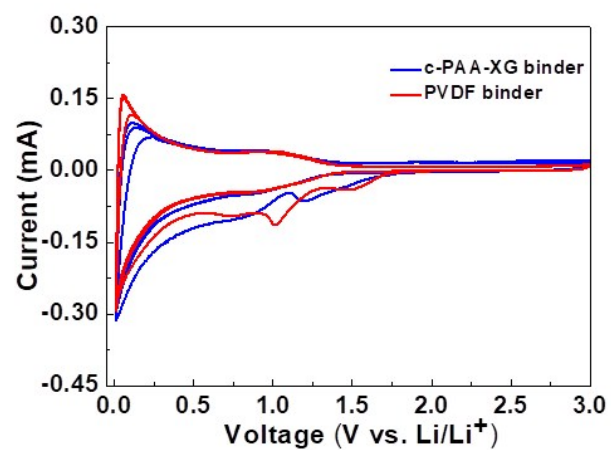

**Fig. S3** Similar CV curves of PVDF and c-PAA-XG binders at  $0.2 \text{ mV s}^{-1}$ , showing the high electrochemical stability of c-PAA-XG binder. The electrodes consist of binders and super P conductive carbon with a mass ratio of 1:1.

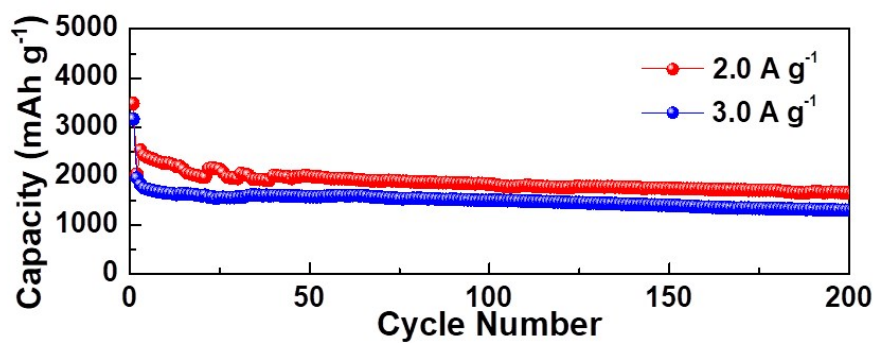

**Fig. S4** Stable cycling performance of nano-Si electrodes with c-PAA-XG binders at 2.0 and 3.0 A g<sup>-1</sup> (the first cycle was at 400 mA g<sup>-1</sup>).

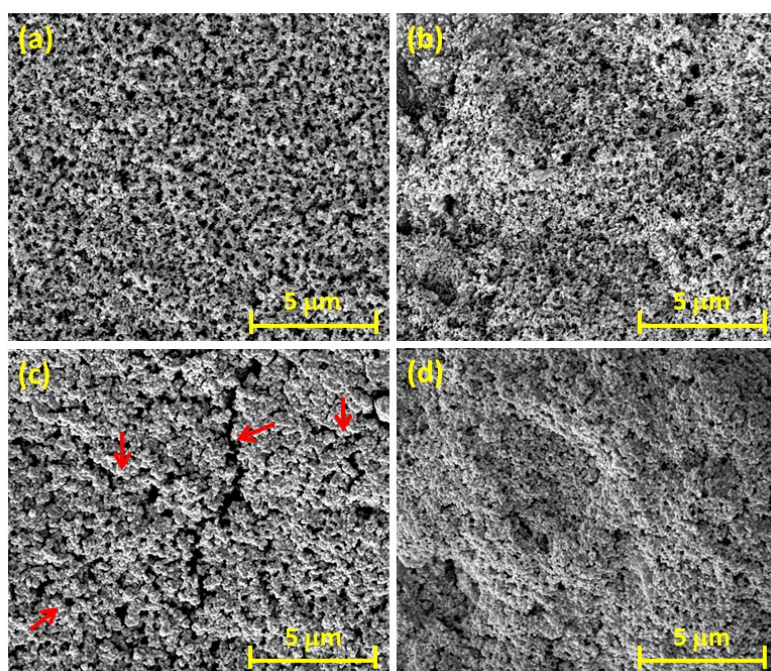

**Fig. S5** SEM images of nano-Si electrodes with PVDF binder (a) before cycling and (c) after the first charge and discharge processes, and with c-PAA-XG binder (b) before cycling and (d) after the first charge and discharge processes.

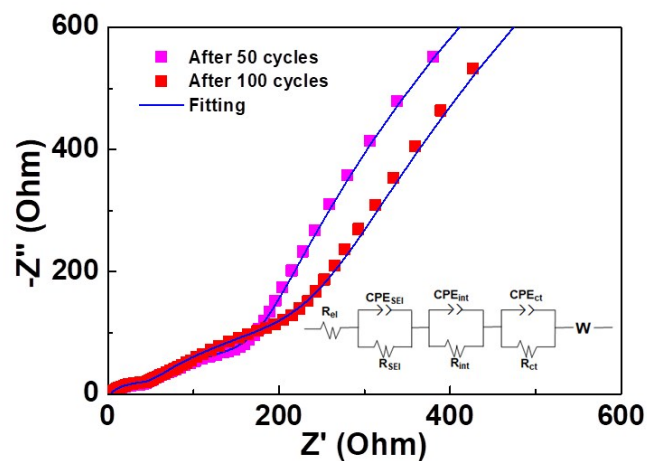

**Fig. S6** Nyquist plots of nano-Si electrode with c-PAA-XG binder after 50 cycles and after 100 cycles. Inset is the fitting equivalent circuit, in which  $R_{SEI}$  is assigned to SEI film resistance,  $R_{int}$  is assigned to interphase electronic contact resistance, and  $R_{ct}$  is assigned to charge transfer resistance.

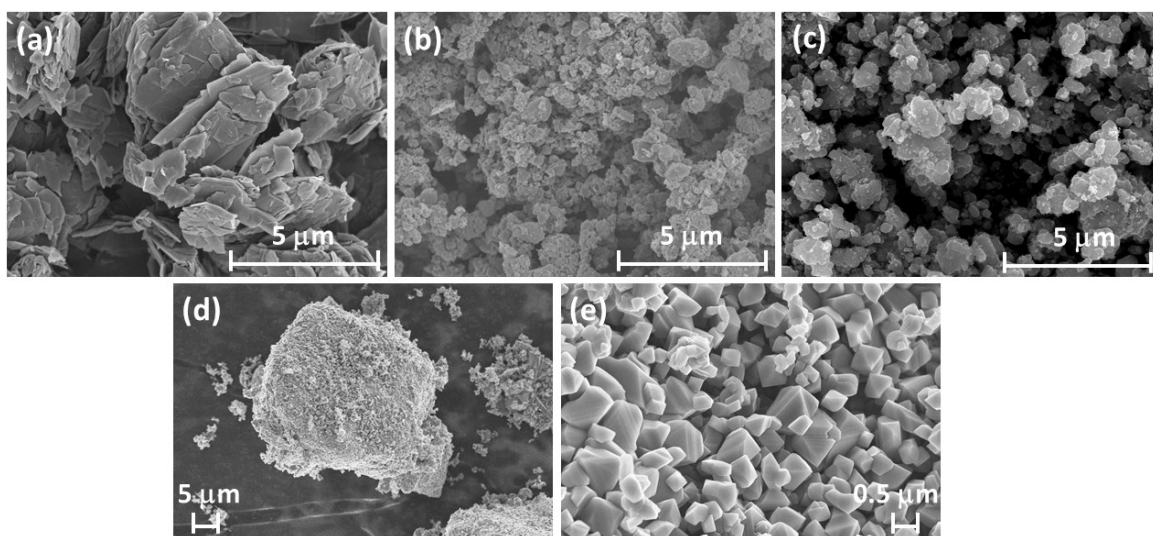

**Fig. S7** SEM images of (a) graphite micro-flakes, two kinds of  $\text{LiFePO}_4$  nano-particles: (b)  $\text{LiFePO}_4$ -1 and (c)  $\text{LiFePO}_4$ -2, and (d, e)  $\text{LiMn}_2\text{O}_4$  nano/micro-particles.



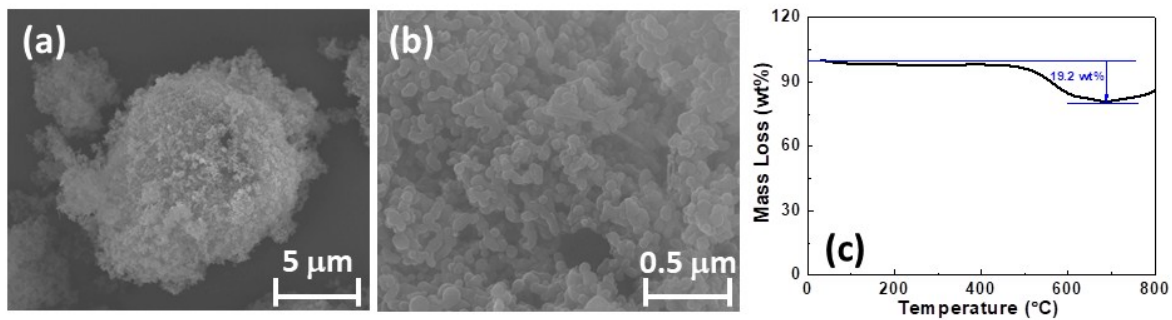

**Fig. S8** (a, b) SEM images, and (c) TGA curve with a heating rate of 10 °C min<sup>-1</sup> under air flow of as-prepared nano/micro-Si/C composite.

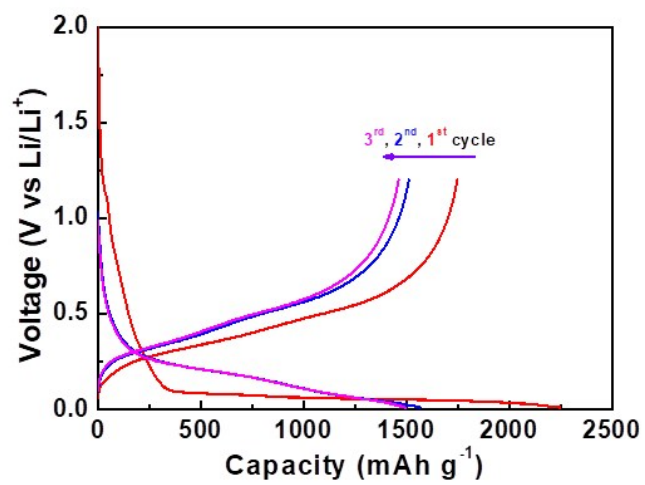

**Fig. S9** Charge-discharge curves of Si/C anode with a high loading of 7.1 mg cm<sup>-2</sup>.

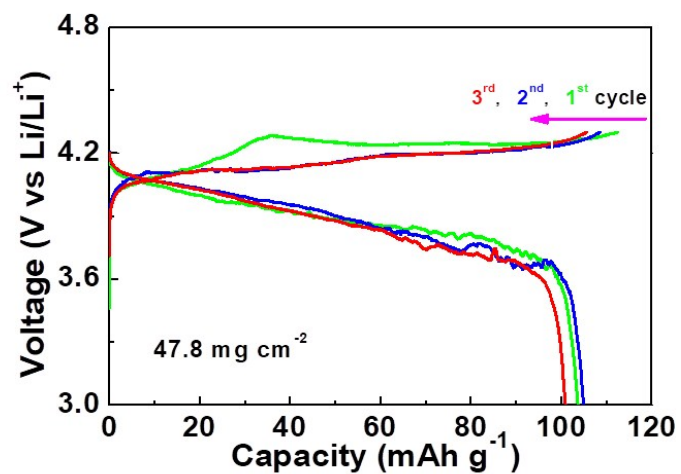

**Fig. S10** Charge-discharge curves of LiMn<sub>2</sub>O<sub>4</sub> cathode with a loading of 47.8 mg cm<sup>-2</sup> at 0.03 C.

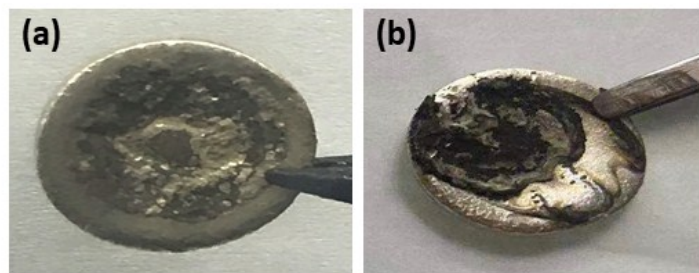

**Fig. S11** Digital photos of Li anodes from the cells with: (a) graphite anode with a loading of  $27.4 \text{ mg cm}^{-2}$  after the 25<sup>th</sup> charging process, and (b) LiFePO<sub>4</sub> cathode with a loading of  $37.8 \text{ mg cm}^{-2}$  after the 22<sup>nd</sup> charging process.

**Table S1** Comparison of the active material loading and areal capacity of Si-based anodes for Li-ion batteries in recently published excellent studies.

| Ref. <sup>a</sup> | Active material loading (mg cm <sup>-2</sup> ) | Reversible areal capacity <sup>b</sup> (mAh cm <sup>-2</sup> ) |
|-------------------|------------------------------------------------|----------------------------------------------------------------|
| <b>This work</b>  | <b>18.3</b>                                    | <b>27.7</b>                                                    |
| 13                | 1.2                                            | 1.52                                                           |
| 22                | 1.1                                            | 3.2                                                            |
| 27                | 0.5-0.7                                        | 1.8                                                            |
| 46                | 6.2                                            | 3.2                                                            |
| 47                | 4.9                                            | ~8.0                                                           |
| 48                | 8.2                                            | 3.4                                                            |
| 49                | 8.5                                            | 4.0                                                            |
| 50                | 0.6                                            | 1.5                                                            |
| 51                | 1.7                                            | ~4.2                                                           |
| 52                | 0.9                                            | 2.8                                                            |
| 53                | 0.35-0.5                                       | 1.1                                                            |
| 54                | 0.5                                            | 1.1                                                            |

<sup>a</sup> The references are listed in the main text

<sup>b</sup> The highest reversible areal capacity in the references
